# Supplementary material for: Tandem repeats discovery service (TReaDS) applied to finding novel cis-acting factors in repeat expansion diseases
Source: PubMed Central journal article supplement (PMC3303744; doi:10.1186/1471-2105-13-s4-s3), 2012-03-28
Supplement: 1471-2105-13-S4-S3-S1.pdf [file 1471-2105-13-S4-S3-S1.pdf]

# Tandem repeats discovery service (TReaDS) applied to finding novel cis-acting factors in repeat expansion diseases – supplementary information —

Marco Pellegrini<sup>1</sup>, M. Elena Renda<sup>\*1</sup>, Alessio Vecchio<sup>2</sup>

<sup>1</sup>Istituto di Informatica e Telematica, Consiglio Nazionale delle Ricerche, Pisa I-56124, Italy

<sup>2</sup>Dipartimento di Ingegneria dell'Informazione, Università di Pisa, Pisa I-56122, Italy

Email: Marco Pellegrini - marco.pellegrini@iit.cnr.it; M. Elena Renda\* - elena.renda@iit.cnr.it; Alessio Vecchio - a.vecchio@iet.unipi.it;

\*Corresponding author

| Disease code | Gene    | NCBI code      |
|--------------|---------|----------------|
| DRPLA        | ATN1    | NM_001007026.1 |
| HD           | HTT     | NM_002111.6    |
| SBMA         | AR      | NM_000044.2    |
| SCA1         | ATXN1   | NM_000332.3    |
| SCA2         | ATXN2   | NM_002973.3    |
| SCA3         | ATXN3   | NM_004993.5    |
| SCA6         | CACNA1A | NM_000068.3    |
| SCA7         | ATXN7   | NM_000333.3    |
| SCA17        | TBP     | NM_003194.4    |

Table 1: Table of sequence NCBI codes for PolyQ TR.

| Disease code | Gene   | NCBI code   |
|--------------|--------|-------------|
| BPES         | FOXL2  | NG_012454.1 |
| HPE5         | ZIC2   | NG_007085.2 |
| CCHS         | PHOX2B | NG_008243.1 |
| ISSX         | ARX    | NG_008281.1 |
| MRGH         | SOX3   | NG_009387.1 |
| CCD          | RUNX2  | NG_008020.1 |
| HFGS         | HOXA13 | NG_008181.1 |
| SPD1         | HOXD13 | NG_008137.1 |
| OPMD         | PABPN1 | NG_008239.1 |

Table 2: Table of sequence NCBI codes for PolyA TR.

| Disease code | Gene    | NCBI code      |
|--------------|---------|----------------|
| FRAXA/FXTAS  | FMR1    | NG_007529.1    |
| FRAXE        | AFF2    | NG_016313.1    |
| FRDA         | FXN     | U43748.1       |
| DM1          | DMPK    | NM_001081560.1 |
| DM2          | ZNF9    | NG_011902.1    |
| SCA8         | ATXN8OS | NR_002717.2    |
| SCA10        | ATXN10  | NG_016212.1    |
| SCA12        | PPP2R2B | AF152102.1     |
| EPM1         | CSTB    | NG_011545.1    |
| HDL-2        | JPH3    | AF429315.1     |

Table 3: Table of sequence NCBI codes for non PolyA non PolyQ TR.

| Gene                            | NCBI code   |
|---------------------------------|-------------|
| NFAT5                           | AF163836    |
| vascular endothelial cadherin 2 | AF240635    |
| PRDM8                           | NM_020226   |
| PRDM10                          | NM_020228   |
| (TNRC3) MAML3                   | NM_018717.4 |
| ATBF1-A                         | L32832      |
| USP7                            | NM_003470   |
| IRS1                            | NM_005544   |
| DACH1                           | NM_004392   |
| (ATBF1) ZFH3                    | NM_006885   |
| NRG2                            | NM_004883   |
| FBX11                           | AF176706    |
| PCQAP                           | NM_015889   |
| (DRIL2) ARID3B                  | NM_006465   |
| RAI1                            | NM_030665.3 |
| POU3F2                          | NM_005604   |
| PALM2-AKAP2                     | NM_007203   |

Table 4: Table of Table of sequence NCBI codes for a sample of sequences containing CAG-encoded polyglutamine.

| Gene/Protein | NCBI code      | SNP names                                                                                                                                    |
|--------------|----------------|----------------------------------------------------------------------------------------------------------------------------------------------|
| FZD6         | NM_003506.3    | rs151339003, rs151339002                                                                                                                     |
| NSDHL        | NM_015922.2    | rs137853863, rs116840822                                                                                                                     |
| GJB1         | NM_001097642.2 | rs116840819, rs116840818,<br>rs116840817, rs116840816,<br>rs116840815, rs104894901,<br>rs104894825, rs104894824,<br>rs104894822, rs104894812 |
| IDS          | NM_006123.4    | rs113993955, rs113993954,<br>rs113993953, rs113993949,<br>rs113993945                                                                        |
| IDS          | NM_001166550.1 | rs113993951, rs113993946                                                                                                                     |
| SLC16A2      | NM_006517.3    | rs104894939, rs104894938                                                                                                                     |
| NSDHL        | NM_015922.2    | rs104894909, rs104894901                                                                                                                     |
| ABCB7        | NM_004299.3    | rs80356714, rs80356713                                                                                                                       |
| TIMM8A       | NM_004085.3    | rs80356560, rs80356559                                                                                                                       |
| UBA1         | NM_153280.2    | rs80356547, rs80356546,<br>rs80356545                                                                                                        |
| FLNA         | NM_001456.3    | rs80338841, rs80338837                                                                                                                       |
| MED12        | NM_005120.2    | rs80338759                                                                                                                                   |
| PRPS1        | NM_002764.3    | rs80338732, rs80338731,<br>rs80338676, rs80338675                                                                                            |
| ARSE         | NM_000047.2    | rs80338714, rs80338713,<br>rs80338711, rs80338710                                                                                            |

Table 5: Table of pathogenic SNPs in Homo sapiens from dbSNP. The table reports: gene/protein code, NCBI code for the analyzed sequence, codes of pathogenic SNP.

| Gene/Protein          | NCBI code      | In/Del names                                                                                                                                                                                                                                                                                                                                                                                |
|-----------------------|----------------|---------------------------------------------------------------------------------------------------------------------------------------------------------------------------------------------------------------------------------------------------------------------------------------------------------------------------------------------------------------------------------------------|
| CFTR/MRP              | NM_001171.4    | rs111113625, rs72664225                                                                                                                                                                                                                                                                                                                                                                     |
| OTC                   | -              | rs111060773, rs72558496, rs111060774                                                                                                                                                                                                                                                                                                                                                        |
| OTC                   | NM_000531.5    | rs72558496, rs72558469, rs72558460, rs72558459,<br>rs72558458, rs72558457, rs72558453, rs72558452,<br>rs72558439, rs72558438, rs72558434, rs72558422,<br>rs72556285, rs72556264, rs72556255, rs72556251,<br>rs72554357, rs72554355, rs72554354, rs72554353,<br>rs72554343, rs72554334, rs72554314, rs72554313,<br>rs72552299, rs72552298, rs72552297, rs67870245,<br>rs67839039, rs67294956 |
| HS mito-<br>chondrion | NC_012920.1    | rs111033319                                                                                                                                                                                                                                                                                                                                                                                 |
| NSDHL                 | NM_015922.2    | rs121909834, rs121909833                                                                                                                                                                                                                                                                                                                                                                    |
| GJB1                  | NM_001097642.2 | rs116840823, rs116840820                                                                                                                                                                                                                                                                                                                                                                    |
| SLC16A2               | NM_006517.3    | rs113994166, rs113994164                                                                                                                                                                                                                                                                                                                                                                    |
| SLC6A8                | NM_005629.3    | rs80338740, rs80338739                                                                                                                                                                                                                                                                                                                                                                      |
| CACNA1F               | NM_005183.2    | rs80359870                                                                                                                                                                                                                                                                                                                                                                                  |
| FLNA                  | NM_001456.3    | rs80338840                                                                                                                                                                                                                                                                                                                                                                                  |
| KCNQ2                 | NM_172108.3    | rs118192246, rs118192245, rs118192244,<br>rs118192243, rs118192242, rs118192241,<br>rs118192231, rs118192230, rs118192227,<br>rs118192222, rs118192213, rs118192212,<br>rs118192210, rs118192198, rs118192197,<br>rs118192196, rs118192192, rs118192191,<br>rs118192189, rs118192188, rs118192187                                                                                           |

Table 6: Table of pathogenic in/dels in Homo sapiens from dbSNP and covering fuzzy tandem repeats. The table reports: gene/protein code, NCBI code for the analyzed sequence, codes of pathogenic in/del.
